# Supplementary material
Source: Research Square preprint supplement (doi:10.21203/rs.3.rs-9031201/v1)
Supplement: Supplementary file 1 [file f4ad99d105d4b4e334ea876a.docx]

**Starch biotransformation by Lactococcus lactis: three strategies for process optimization**

Valérie Laroute, Nathalie Aubry, Pauline Goodwin, Arthur Raymond, Sébastien Nouaille and Muriel Cocaign-Bousquet.


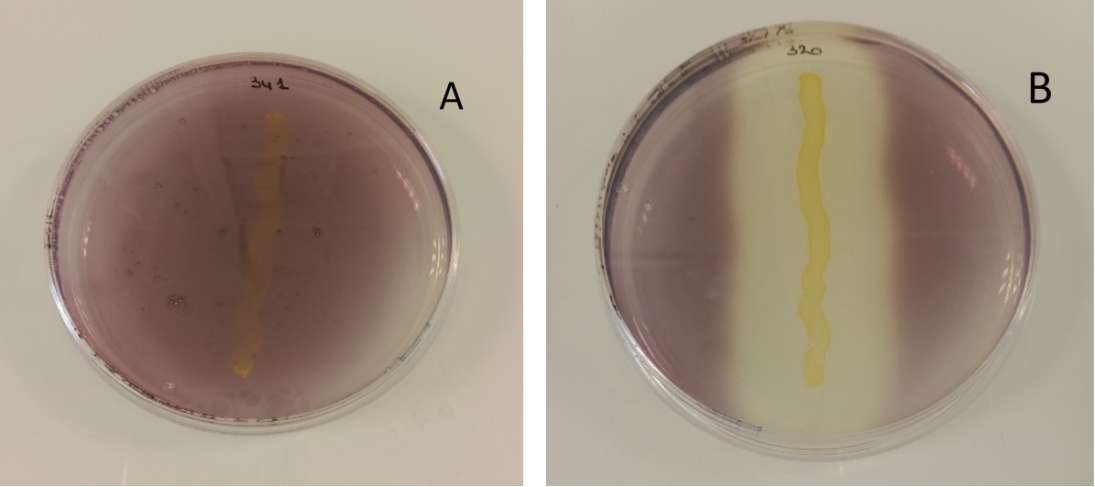


**Figure S1:** **Visualisation of starch degrading activity.** IL1403 (A) and IL1403amy+ (B) were striped on LB agar plates containing 0.2 % starch and 1 g/L glucose. After incubation for 72 h at 30°C plates were exposed to iodine staining to color starch. Clear zone indicates starch hydrolysis.


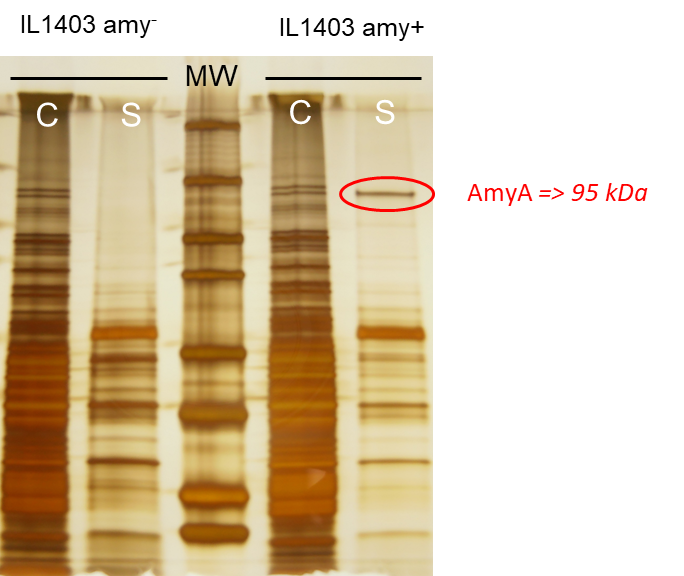


**Figure S2:****-amylase secretion in IL1403amy+.**SDS-PAGE gel of total proteins was stained with silver nitrate. MW molecular weight marker, C cell pellet, S supernatant fraction for IL1403amy**-**and IL1403 amy+

From exponentially growing cultures, proteins present in cell and supernatant fractions were prepared as previously described (Nouaille et al. 2004, doi: 10.1128/AEM.70.3.1600-1607.2004) Electrophoresis conditions was performed in absence of -mercaptoethanol with a 10 % running gel (acrylamide) and 5 % stacking gel. Gels were run at a constant 150 V for 1 h at 25°C. Proteins were stained by the silver method.

**Table S1** : **Phenotypic characterisation of 14 Lactococcus lactis strains**. Genetic charactérisation (*) and hydrolysis casein determination were obtained from Couderc et al., 2022.

The culture of 14 *L. lactis* was performed in microplate to determine their ability to consume different carbon sources. Overnight cultures (from deepwell plates) in semi-synthetic medium [ glucose (2.5 g/L), yeast extract (YE) (10 g/L) KH2PO4 (9 g/L), K2HPO4 (7.5 g/L), MgSO4 7 H2O (0.2 g/L), MnSO4 (0.05 g/L)] grown at 30°C without shaking, were inoculated (1:6) in 200 µL of fresh medium for 3 hours (i.e. until it reached OD580 = 0.6-0.8 corresponding to late-exponential phase cells). Inoculation for screening of different carbon sources was at 2.5% with cells from precultures harvested in new microplates containing 200 µL of semi-synthetic medium (initial pH = 6.6) supplemented with lactose, galactose, fructose, sucrose (5 g/L), glucose (1 g/L), maltose, maltotriose or isomaltose (5 g/L). Biomass was estimated hourly in the microplate without sampling for 24 hours by the measurement of OD580 with microplate reader (SpectraMax Plus, Molecular Devices).


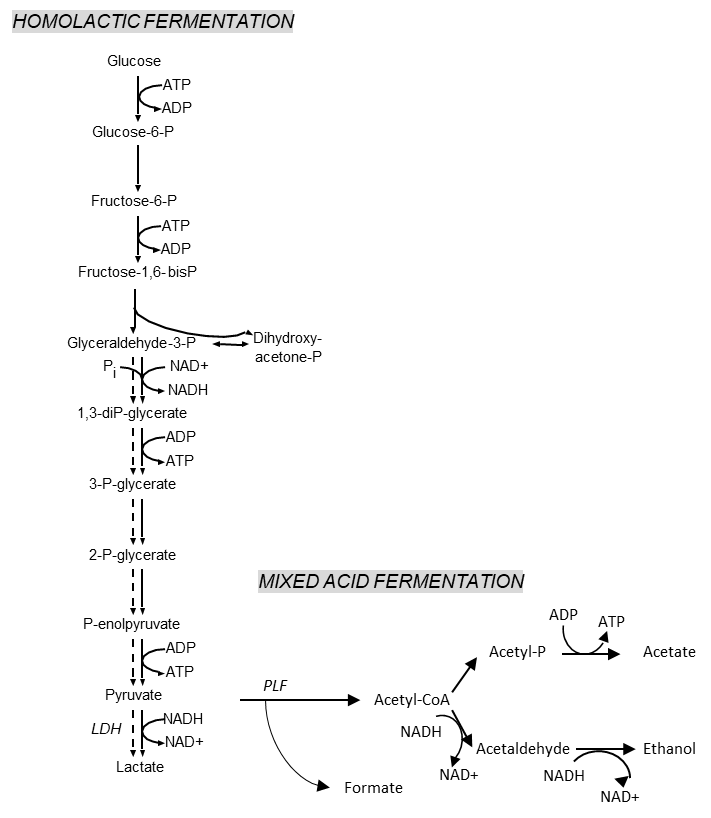


**Figure S3**: Simplified schema of the homolactic and mixed acid pathway in anaerobic glucose fermentation. LDH = lactate dehydrogenase, PFL = pyruvate formate lyase.
